# Supplementary material for: Liver hyperplasia after tamoxifen induction of Myc in a transgenic medaka model
Source: PubMed Central journal article supplement — Dis Model Mech. 2012 Mar 15;5(4):492–502. doi: 10.1242/dmm.008730 (PMC3380712; doi:10.1242/dmm.008730), 2012-03-15
Supplement: supp_008730_DMM008730TableS1.pdf [file supp_008730_DMM008730TableS1.pdf]

**A**

|                         | <b>c-myc17</b> | <b>c-myc 20</b> |
|-------------------------|----------------|-----------------|
| <b>c-myc17</b>          | ---            | 47%             |
| <b>Human c-myc</b>      | 46%            | 55%             |
| <b>Fugu c-myc</b>       | 51%            | 84%             |
| <b>Zebrafish c-myca</b> | 49%            | 70%             |
| <b>Zebrafish c-mycb</b> | 48%            | 69%             |
| ---                     | ---            | ---             |

**B**

|                        | <b>c-myc17</b> | <b>c-myc20</b> |
|------------------------|----------------|----------------|
| <b>Human c-myc HLH</b> | 55%            | 78%            |
| <b>Human DBD</b>       | 92%            | 100%           |
| <b>Human LZ</b>        | 68%            | 50%            |
| <b>c-myc17 HLH</b>     | ---            | 68%            |
| <b>c-myc17 DBD</b>     | ---            | 93%            |
| <b>c-myc17 LZ</b>      | ---            | 61%            |
