# Supplementary material for: Liver hyperplasia after tamoxifen induction of Myc in a transgenic medaka model
Source: PubMed Central journal article supplement — Dis Model Mech. 2012 Mar 15;5(4):492–502. doi: 10.1242/dmm.008730 (PMC3380712; doi:10.1242/dmm.008730), 2012-03-15
Supplement: supp_008730_DMM008730TableS2.pdf [file supp_008730_DMM008730TableS2.pdf]

| <b>human myc<br/>up. genes</b> | <b>medaka<br/>chromosome</b> | <b>human myc<br/>down. genes</b> | <b>medaka<br/>chromosome</b> |
|--------------------------------|------------------------------|----------------------------------|------------------------------|
| POU5F1B                        | 12                           | GSDMC                            | not present                  |
| FAM84B                         | 11 and 16                    | FAM49B                           | 17                           |
| TRIB1                          | 11                           | ASAP1                            | not present                  |
| NSMCE2                         | not present                  | ADCY8                            | 17                           |
| TMEM65                         | 11 and 16                    | EFR3A                            | not present                  |
| NDUFB9                         | 11                           | OC90                             | not present                  |
| KLHL38                         | 11 and 16                    | HHLA1                            | not present                  |
| FAM91A1                        | 11                           | KCNQ3                            | 17                           |
| MTSS1                          | 11 and 16                    | LRRC6                            | 17                           |
| TRMT12                         | 10                           | TMEM71                           | not present                  |
| RNF139                         | not present                  | NDRG1                            | 11 and 16                    |
| TATDN1                         | not present                  | PHF20L1                          | not present                  |
| ZNF572                         | not present                  | ZFAT                             | 16                           |
| SQLE                           | 16                           | KHDRBS3                          | 11                           |
| KIAA0196                       | 16                           | COL22A1                          | 11                           |
| FER1L6                         | 21                           | KCNK9                            | 11                           |
| WDR67                          | 16                           | PTK2                             | 16                           |
| C8orf76                        | 16                           | SLC45A4                          | 16                           |
| ZHX1                           | 11                           | CHRAC1                           | 11                           |
| ATAD2                          | 16                           | TRAPPC9                          | 11                           |
