# Supplementary material for: Liver hyperplasia after tamoxifen induction of Myc in a transgenic medaka model
Source: PubMed Central journal article supplement — Dis Model Mech. 2012 Mar 15;5(4):492–502. doi: 10.1242/dmm.008730 (PMC3380712; doi:10.1242/dmm.008730), 2012-03-15
Supplement: supp_008730_DMM008730TableS3.pdf [file supp_008730_DMM008730TableS3.pdf]

| <i>c-myc17</i> up./<br>down. genes | <i>c-myc20</i> up./<br>down. genes | <i>fugu c-myc</i><br>up./down. genes | orthologue in<br>medaka chr. |
|------------------------------------|------------------------------------|--------------------------------------|------------------------------|
| <i>trimm55*</i>                    | <i>ankh</i>                        | <i>ankh</i>                          | 20                           |
| <i>crh*</i>                        | <i>vps41</i>                       | <i>fam105b</i>                       | 20                           |
| <i>q9w7r1</i>                      | <i>mrpl15</i>                      | <i>orf36c7</i>                       | 20                           |
| <i>adhfe1</i>                      | <i>oprk1**</i>                     | <i>pou6f2</i>                        | 20                           |
| <i>cd3e</i>                        | <i>chmp5**</i>                     | <i>vps41</i>                         | 20                           |
| <i>ttc19</i>                       | <i>c7orf36</i>                     | <i>esco1</i>                         | 20                           |
| <i>slc39a6</i>                     | <i>fastkd3</i>                     | <i>sox17</i>                         | 20                           |
| <i>cd3e</i>                        | <i>myom1</i>                       | <i>rp111</i>                         | not present                  |
| <i>pla2g2a</i>                     | <i>lpin2**</i>                     | <i>sox17</i>                         | 20                           |
| <i>kcnq3</i>                       | <i>pou6f2</i>                      | <i>mrpl15</i>                        | 20                           |
| <i>lpre6</i>                       | <i>smchd1</i>                      | <i>rgs20</i>                         | 17/20                        |
| <i>ift57</i>                       | <i>emilin2**</i>                   | <i>opk1</i>                          | 20                           |
| <i>mure*</i>                       | <i>esco1</i>                       | <i>chmp5</i>                         | 17/20                        |
| <i>proc</i>                        | <i>mett14</i>                      | <i>fastkd3</i>                       | 20                           |
| <i>vcpip1</i>                      | <i>fam1b</i>                       | <i>myom1</i>                         | 20                           |
| <i>dnajc5b</i>                     | <i>sox17</i>                       | <i>lpin2</i>                         | 17/20                        |
| <i>slc4a2*</i>                     | <i>lyplal</i>                      | <i>emilin2</i>                       | 20                           |
| <i>tmub1</i>                       | <i>rgs20**</i>                     | <i>adcyap1</i>                       | 17/20                        |
| <i>afg3l2</i>                      | <i>yes1</i>                        | <i>yes1</i>                          | 17/20                        |
| <i>adcy8</i>                       | <i>ensof1</i>                      | <i>ensof1</i>                        | 20                           |
| <i>slco5a1*</i>                    | <i>myom1**</i>                     | <i>tmys</i>                          | 20                           |
| <b><i>c-myc17</i></b>              | <b><i>c-myc20</i></b>              | <b><i>fugu c-myc</i></b>             | -                            |
| <i>cap7b1</i>                      | <i>smarcd3</i>                     | <i>fam49b</i>                        | 17                           |
| <i>wdr33</i>                       | <i>chpf2</i>                       | <i>gtbp2</i>                         | 1/15                         |
| <i>sft2d3</i>                      | <i>abcf2</i>                       | <i>asap1</i>                         | not present                  |
| <i>mfn1</i>                        | <i>slc4a2**</i>                    | <i>nfx1</i>                          | not present                  |
| <i>fam132b</i>                     | <i>nrp2</i>                        | <i>smarcd3</i>                       | 20                           |
| <i>pex5l</i>                       | <i>puf60</i>                       | <i>abcf2</i>                         | 20                           |
| <i>arnc1*</i>                      | <i>scrib</i>                       | <i>chpf2</i>                         | 20                           |
| <i>smg7</i>                        | <i>cdv3</i>                        | <i>slc4a2</i>                        | 17/10                        |
| <i>rasal2</i>                      | <i>lztfl1</i>                      | -                                    | -                            |
| <i>dhx9</i>                        | <i>topbp1</i>                      | -                                    | -                            |
| <i>nmnat2</i>                      | <i>dnajc13</i>                     | -                                    | -                            |
| <i>phb2</i>                        | <i>gli3</i>                        | -                                    | -                            |
| <i>bfsp2</i>                       | <i>prpf4b</i>                      | -                                    | -                            |
| <i>opn4</i>                        | <i>c6orf145</i>                    | -                                    | -                            |
| <i>tmx3*</i>                       | <i>tmx3**</i>                      | -                                    | -                            |
| <i>c16orf80</i>                    | <i>dse1</i>                        | -                                    | -                            |
| <i>c7orf11</i>                     | <i>cdh19</i>                       | -                                    | -                            |
| <i>atg10</i>                       | <i>cdh7**</i>                      | -                                    | -                            |
| <i>tmem70</i>                      | <i>impa1**</i>                     | -                                    | -                            |
| <i>cyp7a1</i>                      | <i>fbx17</i>                       | -                                    | -                            |
| <i>impa1*</i>                      | <i>rala</i>                        | -                                    | -                            |
| <i>cdh7*</i>                       | <i>ralyl**</i>                     | -                                    | -                            |
