# Supplementary material for: Liver hyperplasia after tamoxifen induction of Myc in a transgenic medaka model
Source: PubMed Central journal article supplement — Dis Model Mech. 2012 Mar 15;5(4):492–502. doi: 10.1242/dmm.008730 (PMC3380712; doi:10.1242/dmm.008730), 2012-03-15
Supplement: supp_008730_DMM008730TableS4.pdf [file supp_008730_DMM008730TableS4.pdf]

| <b>Primer name<br/>(amplicon size [bp])</b>  | <b>Primer Sequence</b>                                                                                           |
|----------------------------------------------|------------------------------------------------------------------------------------------------------------------|
| <b>Full length medaka<br/>c-myc17 (1182)</b> | Fwd 5'- ATT GCT AAG CTT ATG CCA CCT GTG TTA TC – 3'<br>Rev 5' – TTC GTG GAT CCC CAT GTA AAG TCC TGA GCT GCT – 3' |
| <b>Full length medaka<br/>c-myc20 (1281)</b> | Fwd 5' – ATT GCT AAG CTT CAT GCC GCT GAA TTC AAG – 3'<br>Rev5' – TTC GTG GAT CCC CCT GCA GCT GTG CCA GTC T – 3'  |
| <b>qPCR mER (185)</b>                        | Fwd 5' – AAG CCT CAA TGA TGG GCT TA – 3'<br>Rev 5' – AAA GCC TGG CAC TCT CTT TG – 3'                             |
| <b>qPCR ef1a1 (213)</b>                      | Fwd 5' – GCC CCT GGA CAC AGA GAC TTC ATC A – 3'<br>Rev 5' – AAG GGG GCT CGG TGG AGT CCA T – 3'                   |
| <b>qPCR ODC1 (239)</b>                       | Fwd 5' – TGA CAA TGC CAA ACT GGT GT – 3'<br>Rev 5' – CCA GCT CCT CAC CCA TAT CA – 3'                             |
| <b>qPCR CBX3 (189)</b>                       | Fwd 5' – CGT CTC GTC AAT GGG AAA GT – 3'<br>Rev 5' – TGT CTC TGG CTC ATC TGT GG – 3'                             |
| <b>qPCR CCT5 (248)</b>                       | Fwd 5' – GGT AAA TCG GGC TGC AGA TA – 3'<br>Rev 5' – GCT TTT TGG CGA TCA GAG TC – 3'                             |
| <b>qPCR EIF3S8 (181)</b>                     | Fwd 5' – GGA GAG GAA CGC AGA ACA AG – 3'<br>Rev 5' – GTG ATG GAA CTG CTT GCT GA – 3'                             |
| <b>qPCR METTL1 (208)</b>                     | Fwd 5' – ACC CAG GGA GTT ATG GGA AC – 3'<br>Rev 5' – GTG TAC ACC AAA CCC CCA AC – 3'                             |
| <b>qPCR endogenous<br/>c-myc17</b>           | Fwd 5' – TGA GCG AGA AGC AGA GCA TA – 3'<br>Rev 5' – CAC CGT CAC CAC ATC AAT CT – 3'                             |
| <b>qPCR c-myc17ER</b>                        | Fwd 5' – ATC CTG AGA AAG GCG ACA GA – 3'<br>Rev 5' – AAG GAC AAG GCA GGG CTA TT – 3'                             |
| <b>qPCR endogenous<br/>c-myc20</b>           | Fwd 5' – GGC TGT CAA AAG GCT GAA AC – 3'<br>Rev 5' – GTC GCC TTC TTC AGG ATC AC – 3'                             |
